# Supplementary material for: Keep your enemies closer: enhancing biological control through individual movement rules to retain natural enemies inside the field
Source: Copernicus journal article supplement (doi:10.5194/we-19-15-2019), 2019-01-16
Supplement: Supplementary file 1 [file we-19-15-2019-supplement.pdf]

Supplement of Web Ecol., 19, 15–26, 2019  
<https://doi.org/10.5194/we-19-15-2019-supplement>  
© Author(s) 2019. This work is distributed under  
the Creative Commons Attribution 4.0 License.

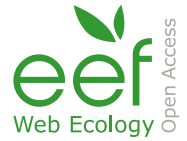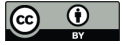

*Supplement of*

## **Keep your enemies closer: enhancing biological control through individual movement rules to retain natural enemies inside the field**

**Thomas Delattre et al.**

*Correspondence to:* Thomas Delattre ([thomas.delattre@inra.fr](mailto:thomas.delattre@inra.fr))

The copyright of individual parts of the supplement might differ from the CC BY 4.0 License.

## 1 Additional information

### 3 S1 Presentation of the models following the ODD protocol

#### 5 S1.1 Foraging model

##### 6 S1.1.1 Model description

7 The description of our individual-based Foraging model follows the ODD protocol (Grimm et al.,  
8 2006, 2010). The model was implemented in NetLogo (Tisue and Wilensky, 2004).

##### 9 S1.1.2 Purpose

10 The purpose of this model is to understand how the qualities of three categories of habitats in  
11 agricultural landscapes affect the residence time of natural enemies in the agricultural plot, and  
12 thereby affect the potential biological control. The Foraging model also serves as a “null  
13 hypothesis” by providing a most simplistic approach to movement rules that can be compared  
14 to more complex models.

##### 15 S1.1.3 Entities, state variables, and scales

16 We are not representing pests in the model but only a generic natural enemy species.  
17 The Foraging Model has only one entity, namely individual natural enemies. They are described  
18 by a set of simple state variables characterising the location of the natural enemy and its  
19 movement ability.

- 20 • Localisation (x, y)
- 21 • Habitat sensitivity (%)
- 22 • Movement ability (energy e)

23 Time steps (ts) are abstract, as well as space units (pixels). Space is described in two  
24 dimensions. The typical simulated plot is a 500 pixels wide square, but its size can be varied by  
25 the experimenter.

26 The three habitat types are the agricultural crops, the grassy field margins (GFMs) and the  
27 hedgerows. The quality of each habitat type can be varied so that each can be considered  
28 hostile, favourable or of intermediate quality, from the point of view of the natural enemy.

##### 29 S1.1.4 Process overview and scheduling

30 The processes of the simulation model are described in the flowchart (Fig. S1).

31 At each time step, the submodel *Forage* is executed for all natural enemies in a random order,  
32 and defines their next location. The residence time calculations are then executed for each  
33 pixel, and summarised at the end of the simulation.

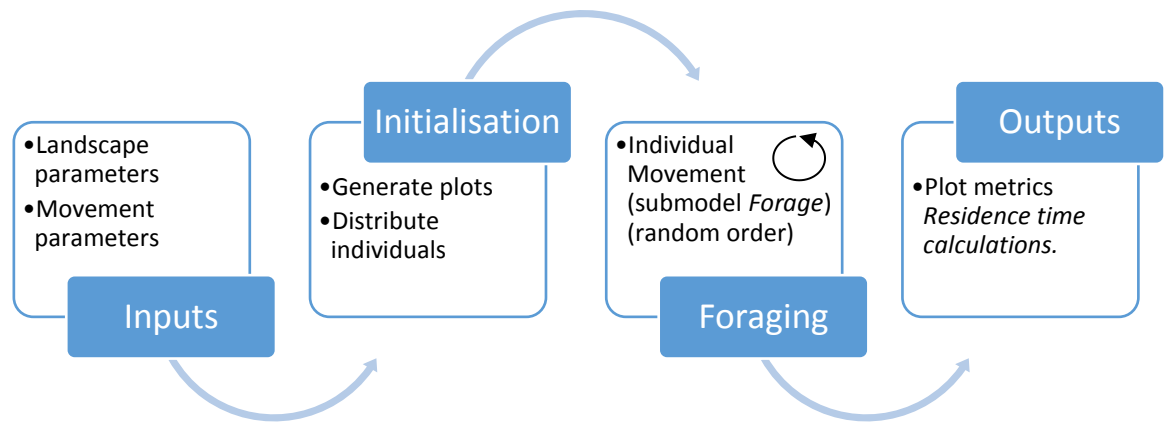

35

36

Figure S1.1. Flowchart of the Foraging model.

37

38

### S1.1.5 Design Concepts

39

*Basic principles:* The movements of natural enemies are mainly foraging movements based on “movement ecology” and “habitat selection” literature and based on a simple non-specific behavioural assumption: movement is a biased random walk affected by local habitat quality (Bartumeus et al., 2005; Bell, 1991). As a result, movements in the model are in part imposed by the random walk, but some adaptation has been taken into account.

44

*Emergence:* The dynamic of natural enemies’ movements and the resulting residence time in the habitat categories emerge from the foraging behaviour of the individuals. The interplay between movement, habitat qualities and their spatial organisation is not straightforward.

47

*Adaptation:* Natural enemies adapt their movement to the habitat cell they are to move on: better cells have a higher probability to be chosen for the next movement. A habitat sensitivity parameter is provided in the inputs, that increase the probability that the best cell is ignored, and a random cell is chosen instead. Due to these parameters, individual optimise the time spent foraging in favourable habitats, and minimise the time spent in unfavourable habitats.

52

*Objectives:* Not relevant.

53

*Learning:* Not relevant.

54

*Interaction:* Not relevant.

55

*Prediction:* Not relevant.

56

*Sensing:* Natural enemies perceive the habitat quality of the cell they are on at the beginning of the time step, and that of the eight neighbouring cells.

58

*Stochasticity:* In the model, the construction of plots (Initialisation section f.) and the individual movements are stochastic. Movements are classically modelled by random processes (Codling et al., 2008) because unpredictability of food distribution for a predator implies stochasticity in the search.

60

61 *Observation:* At each time step, each pixel occupation status is stored, and its residence time is  
62 incremented if at least one individual is located on it. When the simulation is over (when all individuals have  
63 depleted their energy pool), the mean residence time and its variance, and the proportion of unvisited pixels are  
64 calculated for each habitat type, and stored for statistical calculations in R (R Core Team, 2011). Mean field  
65 residence time and its variance are calculated over the residence times of all pixels belonging to a given habitat  
66 type, summed over all simulation time steps.

67

### 68 **S1.1.6 Forage Submodel**

69 At each time step, individuals compare the habitat quality of eight neighbouring cells, and identify the best one.  
70 This core process may be affected, according to the *habitat sensitivity* parameter that has been introduced to  
71 compare different species responses to sets of habitat qualities. This parameter illustrates interspecific variability  
72 in sensitivity to habitat quality (*i.e.* generalist vs specialist species). The probability that a random cell is chosen  
73 instead of the better one is inversely proportional to the habitat sensitivity of the species (*i.e.* a species with a low  
74 habitat sensitivity would have a higher probability to ignore the better cells and engage in a pure random walk).

75 At each time step, the remaining energy pool was decremented by  $1-q/100$ , where  $q$  represents habitat quality of  
76 the current cell. This mechanism allows us to mimic the direct and indirect costs of movement (Bonte et al., 2012)  
77 that are high in hostile habitats and low in favourable habitats. The habitat sensitivity parameter (Table 1) is used  
78 to alter the effect of habitat quality on movement cost, as a proxy of interspecific differences in habitat sensitivity.  
79 A random value  $[-1 < RV < 1]$  is added to the pixel cost with a probability equal to the habitat sensitivity of the  
80 species/100 (*i.e.* adding noise around the cost value). The costs of diagonal and orthogonal moves are identical.

81

### 82 **S1.1.7 Initialisation**

83 The model is initialised by assigning habitat types to cells (either “hedgerow”, “grassy field margin” or “agricultural  
84 plot”). A habitat quality parameter is then attributed to each pixel according to its habitat type, and the quality that  
85 has been attributed to it in the inputs. 2000 individuals are then distributed on random hedgerow cells, with a  
86 random initial orientation, and an energy pool of 500e representing their intrinsic initial movement ability.

#### 87 *S1.1.7.1 Plot Generation*

88 Fields shapes and patterns are obtained using a method similar to a T-tessellation (Papaix et al., 2014) that  
89 consists of seeding the landscape with a defined number of randomly distributed seeds, each of which is a  
90 departure point for three edges that eventually form a rectangle (Figure 1). This method allowed probabilistic  
91 control on the number of polygons, their size and shape, while exploring a diversity of spatial distributions of field  
92 shapes and sizes (Figure 1). In order to focus on habitat quality, the patch density is kept constant to maintain a  
93 stable landscape structure throughout the simulations (see Supplement S2 for the effect of patch density) and we  
94 alter only habitat quality for each landscape element (between extreme values 1 and 99, respectively hostile and  
95 favourable, other values ranging from 5 to 95 with a 5 interval). The landscape is a 500 pixels wide square treated  
96 as a torus, and is composed of 10 to 12 fields surrounded by 4 pixels-wide hedgerows and 5 pixels-wide GFMs  
97 (similar to a typical bocage landscape, Burel et al., 1998; Thenail and Baudry, 2004). Although the field-GFM-  
98 hedgerow trio is used as an example for clarity, the structure could apply to fields surrounded by other types of  
99 borders.

#### 100 *S1.1.7.2 Foraging Parameters*

101 The values used in our case study for foraging parameters are provided in Table 1. They are designed to  
102 represent two hypothetical species, to illustrate the sensitivity of the model to differences in habitat sensitivity. An  
103 “insensitive species” with a movement behaviour that allows individuals to free themselves from local habitat  
104 conditions to reach more easily another region of the landscape: in the Foraging model that species is  
105 characterised by a lower value of the sensitivity to habitat quality parameter (Table1). On the contrary, the  
106 “sensitive species” is characterised by a movement behaviour that depended more strongly on local conditions  
107 (Table 1) with a higher sensitivity to habitat and lower directional persistence.

108

## 109 **S1.2 The Routine & Direct Movements model**

### 110 **S1.2.1 Model description**

111 The description of our individual-based Routine & Direct Movements (RDM) model follows the  
112 ODD protocol (Grimm et al., 2006, 2010). The model was implemented in NetLogo (Tisue and  
113 Wilensky, 2004).

### 114 **S1.2.2 Purpose**

115 The purpose of this model is to understand how the qualities of three categories of habitats in  
116 agricultural landscapes affect the residence time of natural enemies in the agricultural plot, and  
117 thereby affect the potential biological control. The RDM model is designed to illustrate a  
118 different approach to movement, compared to the Foraging model and the SMS. In the RDM  
119 model, individuals react to changes in habitat quality by changing the shape of their path and  
120 the probabilities to pass habitat boundaries (instead of choosing a destination cell at each step).

### 121 **S1.2.3 Entities, state variables, and scales**

122 We are not representing pests in the model but only a generic natural enemy species.  
123 The RDM model has only one entity, namely individual natural enemies. They are described by  
124 a set of simple state variables characterising the location of the natural enemy and its  
125 movement ability.

- 126 • Localisation (x, y)
- 127 • Habitat sensitivity (%)
- 128 • Movement ability (energy e)

129 Time steps (ts) are abstract, as well as space units (pixels). Space is described in two  
130 dimensions. The typical simulated plot is a 500 pixels wide square, but its size can be varied by  
131 the experimenter.

132 The three habitat types are the agricultural crops, the grassy field margins (GFMs) and the  
133 hedgerows. The quality of each habitat type can be varied so that each can be considered  
134 hostile, favourable or of intermediate quality, from the point of view of the natural enemy.

### 135 **S1.2.4 Process overview and scheduling**

136 The processes of the simulation model are described in the flowchart (Fig. S1).  
137 At each time step, the submodel *RDM* is executed for all natural enemies in a random order,  
138 and defines their next location. The residence time calculations are then executed for each  
139 pixel, and summarised at the end of the simulation.

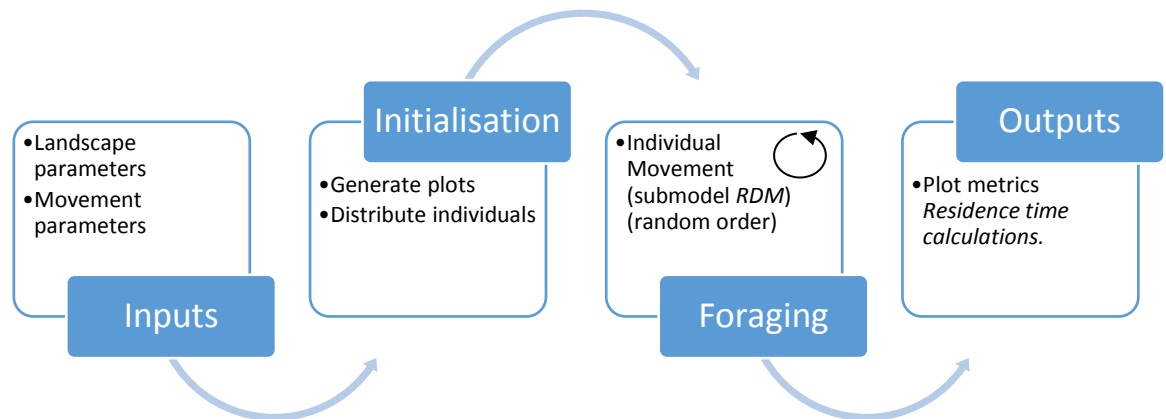

140

141

Figure S1.2. Flowchart of the RDM model.

142

143

### S1.2.5 Design Concepts

144

145

146

147

148

149

150

151

152

153

154

155

156

157

158

159

160

161

162

163

164

165

166

*Basic principles:* The movements of natural enemies are mainly foraging movements based on “movement ecology” and “habitat selection” literature and based on simple non-specific behavioural assumptions: movement is a correlated random walk whose shape is affected by local habitat quality and contrast at habitat boundaries (Bartumeus et al., 2005; Bell, 1991; Van Dyck and Baguette, 2005). As a result, movements in the model are in part imposed by the random walk, but some adaptation has been taken into account.

*Emergence:* The dynamic of natural enemies’ movement and the resulting residence time in the habitat categories emerge from the movement behaviour of individuals. The interplay between movement, habitat qualities and their spatial organisation is not straightforward.

*Adaptation:* Natural enemies adapt their movement to the habitat cell they are located on. On favourable habitat, they move slowly and sinuously, and tend to avoid crossing towards unfavourable habitats. On the contrary, on unfavourable habitats, they move fast and almost straight, and direct to each favourable habitat encountered. Due to these changes, they optimise the time they spend foraging in favourable habitats and minimise the time they spend in unfavourable habitats. The habitat sensitivity parameter is added to compare different scenarios with different species response to landscape. The effect of habitat quality on the sinuosity of the path and on the probability to cross a boundary are proportional to the habitat sensitivity of the species: an insensitive species will be more likely to ignore the current habitat quality when defining its path sinuosity, and to ignore the contrast of a boundary when deciding if it is to cross it.

*Objectives:* Not relevant.

*Learning:* Not relevant.

*Interaction:* Not relevant.

*Prediction:* Not relevant.

*Sensing:* Natural enemies perceive the habitat quality of the cell they are on at the beginning of the time step, and that of the eight neighbouring cells.

167 *Stochasticity*: In the model, the construction of plots (Initialisation section f.) and the individual  
168 movements are stochastic. Movements are classically modelled by random processes (Codling et al., 2008)  
169 because unpredictability of food distribution for a predator implies stochasticity in the search.

170 *Observation*: At each time step, each pixel occupation status is stored, and its residence time is  
171 incremented if at least one individual is located on it. When the simulation is over (when all individuals have  
172 depleted their energy pool), the mean field residence time and its variance, and the proportion of unvisited pixels  
173 are calculated for each habitat type, and stored for statistical calculations in R (R Core Team, 2011). Mean field  
174 residence time and its variance are calculated over the residence times of all pixels belonging to a given habitat  
175 type, summed over all simulation time steps.

176

## 177 **S1.2.6 RDM Submodel**

178 At each time step, individuals read the habitat quality of their current cell. According to their quality, they define  
179 the sinuosity of their path (a higher quality habitat causes higher sinuosity). The sinuosity of the path is then used  
180 to select stochastically a tentative cell for the next movement among the eight neighbour cells. If that tentative cell  
181 has a different habitat quality than the cell of origin, a boundary-crossing routine is executed. The individual  
182 chooses stochastically whether to cross that boundary, with a probability that is proportional to the contrast  
183 between both origin and destination pixel. The habitat sensitivity parameter was added in order to compare  
184 different scenarios with different species response to landscape. The effect of habitat quality on the sinuosity of  
185 the path and on the probability to cross a boundary are proportional to the habitat sensitivity of the species: an  
186 insensitive species will be more likely to ignore the current habitat quality when defining its path sinuosity, and to  
187 ignore the contrast of a boundary when deciding if it is to cross it.

188 At each time step, the remaining energy pool was decremented by  $1-q/100$ , where  $q$  represents habitat quality of  
189 the current cell. This mechanism allows us to mimic the direct and indirect costs of movement (Bonte et al., 2012)  
190 that are high in hostile habitats and low in favourable habitats. The habitat sensitivity parameter (Table 1) is used  
191 to alter the effect of habitat quality on movement cost, as a proxy of interspecific differences in habitat sensitivity.  
192 A random value  $[-1 <RV> 1]$  is added to the pixel cost with a probability equal to the habitat sensitivity of the  
193 species/100 (i.e. adding noise around the cost value). The costs of diagonal and orthogonal moves are identical.

194

## 195 **S1.2.7 Initialisation**

196 The model is initialised by assigning habitat types to cells (either “hedgerow”, “grassy field margin” or “agricultural  
197 plot”). A habitat quality parameter is then attributed to each pixel according to its habitat type, and the quality that  
198 has been attributed to it in the inputs. 2000 individuals are then distributed on a random hedgerow cell, with a  
199 random initial orientation, and an energy pool of 500e representing their intrinsic initial movement ability.

### 200 *S1.2.7.1 Plot Generation*

201 Fields shapes and patterns are obtained using a method similar to a T-tessellation (Papaix et al., 2014) that  
202 consists of seeding the landscape with a defined number of randomly distributed seeds, each of which is a  
203 departure point for three edges that eventually form a rectangle (Figure 1). This method allowed probabilistic  
204 control on the number of polygons, their size and shape, while exploring a diversity of spatial distributions of field  
205 shapes and sizes (Figure 1). In order to focus on habitat quality, the patch density is kept constant to maintain a  
206 stable landscape structure throughout the simulations (see Supplement S2 for the effect of patch density) and we  
207 alter only habitat quality for each landscape element (with a 5 interval, from 1 to 99, respectively hostile to

208 favourable). The landscape is a 500 pixels wide square treated as a torus, and is composed of 10 to 12 fields  
209 surrounded by 4 pixels-wide hedgerows and 5 pixels-wide GFMs (similar to a typical bocage landscape, Burel et  
210 al., 1998; Thenail and Baudry, 2004). Although the field-GFM-hedgerow trio is used as an example for clarity, the  
211 structure could apply to fields surrounded by other types of borders.

#### 212 *S1.2.7.2 RDM Parameters*

213 The values used in our case study for foraging parameters are provided in Table 1. They are designed to  
214 represent two hypothetical species, to illustrate the sensitivity of the model to differences in habitat sensitivity. An  
215 “insensitive species” with a movement behaviour that allows individuals to free themselves from local habitat  
216 conditions to reach more easily another region of the landscape: in the RDM model that species is characterised  
217 by a lower value of the sensitivity to habitat quality parameter (Table1). On the contrary, the “sensitive species” is  
218 characterised by a movement behaviour that depended more strongly on local conditions (Table 1) with a higher  
219 sensitivity to habitat and lower directional persistence.

220

221



222

223

224

## S2 Effects of movement ability, population size and patch density

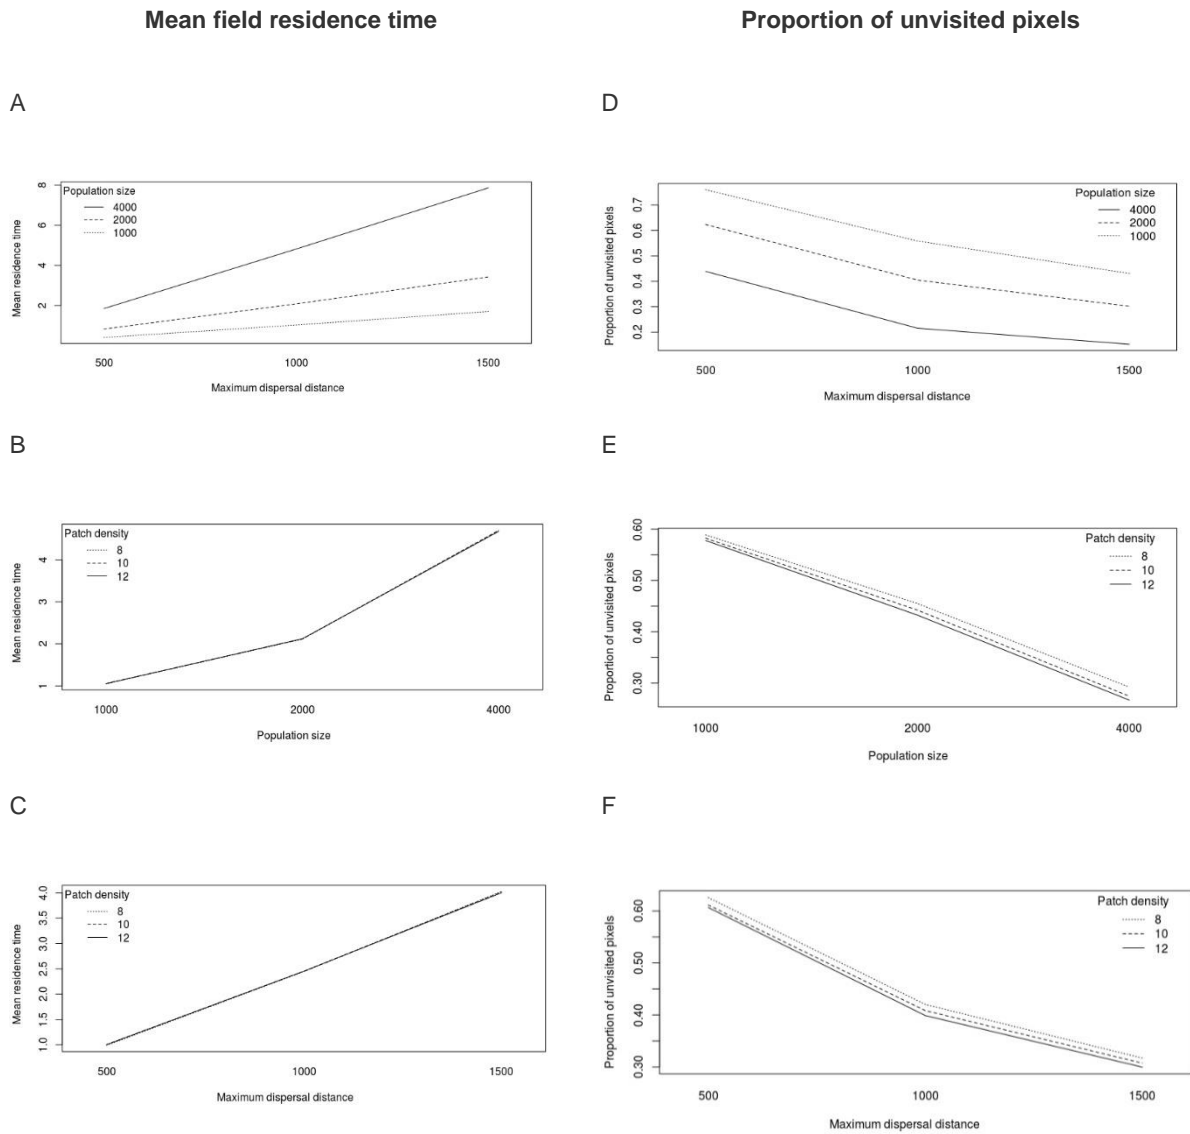

225 Figure S2.1. Mean field residence time (in ts, A — C) and proportion of unvisited field pixels ( $0 \geq p \leq 1$ , D-F) as a  
226 function of interactions between movement ability (pixels, A, C, D, F), population size (number of individuals at  
227 initiation, A, B, D, E), and patch density (number of fields in the landscape, B, C, E, F). C: the three lines are  
228 shown but overlap.

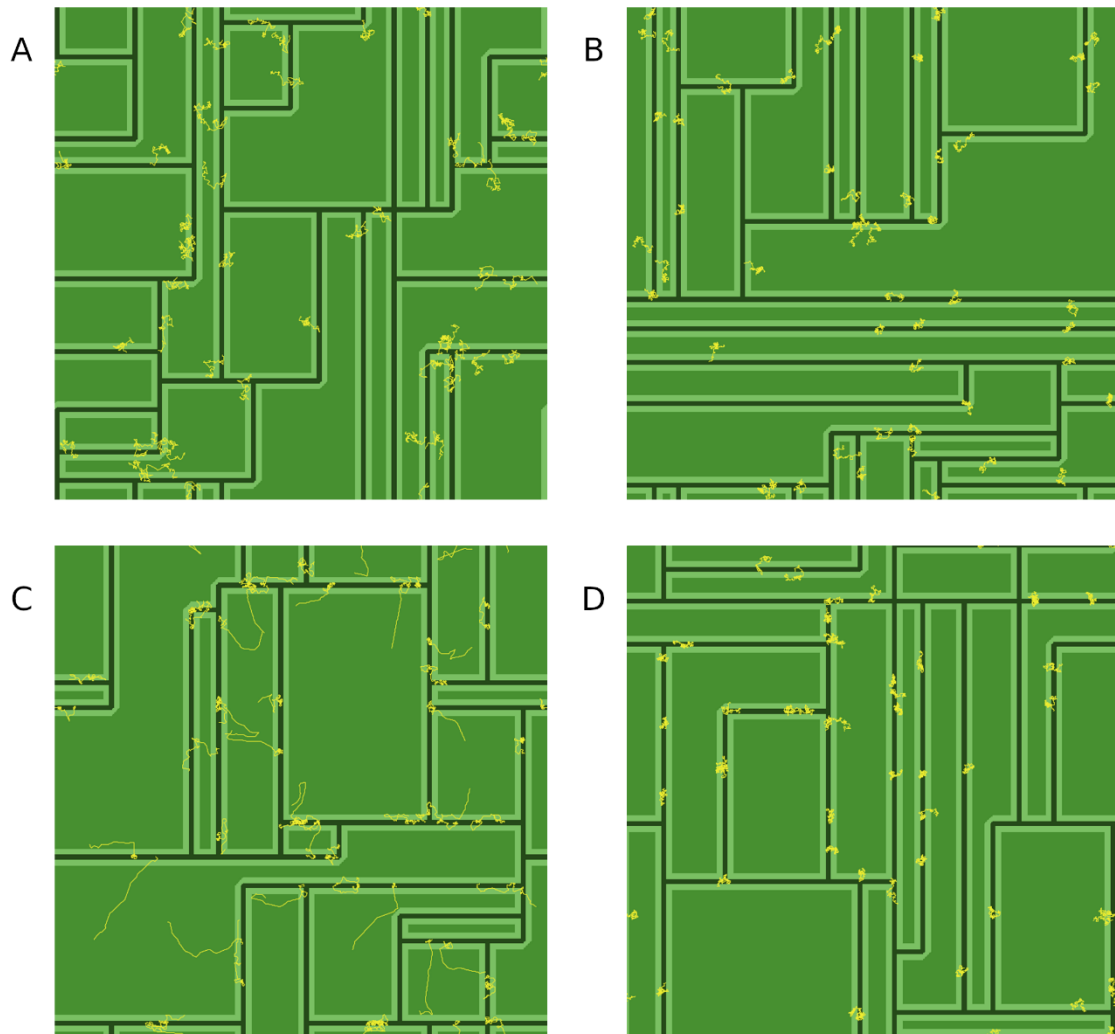

229 *Figure S3.1. Examples of individual movement paths (yellow lines) generated by the RDM model (Routine & Direct Moves: A, C)*  
 230 *and the SMS (Stochastic Movement Simulator: B, D). Agricultural fields (dark green) are separated by grassy field margins (light*  
 231 *green) surrounding hedgerows (black). The habitat qualities of agricultural fields, grassy field margins and hedgerows vary*  
 232 *(respectively of quality 55, 30, 15 in figures 5A, B and 15, 30, 55 in figures 5C, D). N = 50 individual paths, paths length = 200 p.*

233

## 234 References

235

236 Altieri, M. A. and Policy, S.: The Nature and Function of Biodiversity in Agriculture, *Ecol.*, 5–8, 2001.

237 Arrignon, F., Deconchat, M., Sarthou, J. P., Balent, G. and Monteil, C.: Modelling the overwintering strategy of a  
 238 beneficial insect in a heterogeneous landscape using a multi-agent system, *Ecol. Modell.*, 205(3–4), 423–436,  
 239 doi:10.1016/j.ecolmodel.2007.03.006, 2007.

240 Aviron, S., Kindlmann, P. and Burel, F.: Conservation of butterfly populations in dynamic landscapes: The role of  
 241 farming practices and landscape mosaic, *Ecol. Modell.*, 205(1–2), 135–145, 2007.

242 Baguette, M. and Van Dyck, H.: Landscape connectivity and animal behaviour: functional grain as a key

- 243 determinant for dispersal, *Landsc. Ecol.*, 22(8), 1117–1129, doi:10.1007/s10980-007-9108-4, 2007.
- 244 Barbosa, P.: Conservation biological control, Academic Press., 1998.
- 245 Bartumeus, F., da Luz, M. G. E., Viswanathan, G. M. and Catalan, J.: Animal Search Strategies: a Quantitative  
246 Random-Walk Analysis, *Ecology*, 86(11), 3078–3087, doi:10.1890/04-1806, 2005.
- 247 Bell, W. J.: Searching behaviour. The behavioural ecology of finding resources., Chapman & Hall, London., 1991.
- 248 Bianchi, F. J. J. A., Booij, C. J. H. and Tschardtke, T.: Sustainable pest regulation in agricultural landscapes: A  
249 review on landscape composition, biodiversity and natural pest control, *Proc. R. Soc. B Biol. Sci.*, 273(1595),  
250 1715–1727, doi:10.1098/rspb.2006.3530, 2006.
- 251 Bocedi, G., Palmer, S. C. F., Pe'er, G., Heikkinen, R. K., Matsinos, Y. G., Watts, K. and Travis, J. M. J.:  
252 RangeShifter: a platform for modelling spatial eco-evolutionary dynamics and species' responses to  
253 environmental changes, edited by R. Freckleton, *Methods Ecol. Evol.*, 5(4), 388–396, doi:10.1111/2041-  
254 210X.12162, 2014.
- 255 Bonte, D., Van Dyck, H., Bullock, J. M., Coulon, A., Delgado, M., Gibbs, M., Lehouck, V., Matthysen, E., Mustin,  
256 K., Saastamoinen, M., Schtickzelle, N., Stevens, V. M., Vandewoestijne, S., Baguette, M., Barton, K., Benton, T.  
257 G., Chaput-Bardy, A., Clobert, J., Dytham, C., Hovestadt, T., Meier, C. M., Palmer, S. C. F., Turlure, C. and  
258 Travis, J. M. J.: Costs of dispersal., *Biol. Rev. Camb. Philos. Soc.*, doi:10.1111/j.1469-185X.2011.00201.x, 2012.
- 259 Börger, L., Dalziel, B. D. and Fryxell, J. M.: Are there general mechanisms of animal home range behaviour? A  
260 review and prospects for future research, *Ecol. Lett.*, 11(6), 637–650, doi:10.1111/j.1461-0248.2008.01182.x,  
261 2008.
- 262 Broekhuizen, S., C.A., H., van't Maaskamp, F. and Pauwels, T.: The importance of hedgerows for leading  
263 migrating badgers *Meles meles*, *Lutra*, 29, 54–65, 1986.
- 264 Burel, F., Baudry, J., Butet, A., Clergeau, P., Delettre, Y., Le Coeur, D., Dubs, F., Morvan, N., Paillat, G., Petit, S.,  
265 Thenail, C., Brunel, E. and Lefeuvre, J. C.: Comparative biodiversity along a gradient of agricultural landscapes,  
266 *Acta Oecologica-International J. Ecol.*, 19(1), 47–60, 1998.
- 267 Clobert, J., Danchin, E., Dhondt, A. A. and Nichols, J. D.: Dispersal, Oxford University Press, Oxford., 2001.
- 268 Codling, E. A., Plank, M. J. and Benhamou, S.: Random walk models in biology, *J. R. Soc. Interface*, 5(25), 813–  
269 834, doi:10.1098/rsif.2008.0014, 2008.
- 270 Conradt, L., Zollner, P. A., Roper, T. J., Frank, K. and Thomas, C. D.: Foray search: An effective systematic  
271 dispersal strategy in fragmented landscapes, *Am. Nat.*, 161(6), 905–915, 2003.
- 272 Cook, S. M., Khan, Z. R. and Pickett, J. A.: The Use of Push-Pull Strategies in Integrated Pest Management,  
273 *Annu. Rev. Entomol.*, 52(1), 375–400, doi:10.1146/annurev.ento.52.110405.091407, 2007.
- 274 Coombes, D. S. and Sothertons, N. W.: The dispersal and distribution of polyphagous predatory Coleoptera in  
275 cereals, *Ann. Appl. Biol.*, 108(3), 461–474, doi:10.1111/j.1744-7348.1986.tb01985.x, 1986.
- 276 Coulon, A., Aben, J., Palmer, S. C. F., Stevens, V. M., Callens, T., Strubbe, D., Lens, L., Matthysen, E., Baguette,  
277 M. and Travis, J. M. J.: A stochastic movement simulator improves estimates of landscape connectivity, *Ecology*,  
278 96(8), 2203–2213, doi:10.1890/14-1690.1, 2015.
- 279 Delattre, T., Burel, F., Humeau, A., Stevens, V. M., Vernon, P. and Baguette, M.: Dispersal mood revealed by

280 shifts from routine to direct flights in the meadow brown butterfly *Maniola jurtina*, *Oikos*, 119(12), 1900–1908,  
281 doi:10.1111/j.1600-0706.2010.18615.x, 2010a.

282 Delattre, T., Pichancourt, J.-B., Burel, F. and Kindlmann, P.: Grassy field margins as potential corridors for  
283 butterflies in agricultural landscapes: A simulation study, *Ecol. Modell.*, 221(2), 370–377,  
284 doi:10.1016/j.ecolmodel.2009.10.010, 2010b.

285 Delattre, T., Vernon, P. and Burel, F.: An Agri-environmental scheme enhances butterfly dispersal in European  
286 agricultural landscapes, *Agric. Ecosyst. Environ.*, 166, 102–109, 2013.

287 Dennis, P. and Fry, G. L. A.: Field margins: can they enhance natural enemy population densities and general  
288 arthropod diversity on farmland?, *Agric. Ecosyst. Environ.*, 40(1–4), 95–115, 1992.

289 Denys, C. and Tschamtko, T.: Plant-insect communities and predator-prey ratios in field margin strips, adjacent  
290 crop fields, and fallows, *Oecologia*, 130(2), 315–324, doi:10.1007/s004420100796, 2002.

291 Dover, J. W. and Fry, G. L. A.: Experimental simulation of some visual and physical components of a hedge and  
292 the effects on butterfly behaviour in an agricultural landscape, *Entomol. Exp. Appl.*, 100(2), 221–233, 2001.

293 Dunning, J., Danielson, B. and Pulliam, H.: Ecological processes that affect populations in complex landscapes,  
294 *Oikos*, 1992.

295 Van Dyck, H. and Baguette, M.: Dispersal behaviour in fragmented landscapes: Routine or special movements?,  
296 *Basic Appl. Ecol.*, 6(6), 535–545, doi:10.1016/j.baee.2005.03.005, 2005.

297 Ernout, A., Vialatte, A., Butet, A., Michel, N., Rantier, Y., Jambon, O. and Burel, F.: Grassy strips in their  
298 landscape context, their role as new habitat for biodiversity, *Agric. Ecosyst. Environ.*, 166, 15–27,  
299 doi:10.1016/j.agee.2012.07.004, 2013.

300 Fahrig, L., Baudry, J., Brotons, L., Burel, F. G., Crist, T. O., Fuller, R. J., Sirami, C., Siriwardena, G. M. and  
301 Martin, J.-L.: Functional landscape heterogeneity and animal biodiversity in agricultural landscapes, *Ecol. Lett.*,  
302 14(2), 101–112, doi:10.1111/j.1461-0248.2010.01559.x, 2010.

303 Griffiths, G. J. K., Holland, J. M., Bailey, A. and Thomas, M. B.: Efficacy and economics of shelter habitats for  
304 conservation biological control, *Biol. Control*, 45(2), 200–209, doi:10.1016/j.biocontrol.2007.09.002, 2008.

305 Grimm, V. and Railsback, S. F.: *Individual-based Modeling and Ecology*, Princeton University Press, Princeton.,  
306 2005.

307 Grimm, V., Berger, U., Bastiansen, F., Eliassen, S., Ginot, V., Giske, J., Goss-Custard, J., Grand, T., Heinz, S. K.  
308 and Huse, G.: A standard protocol for describing individual-based and agent-based models, *Ecol. Modell.*, 198(1–  
309 2), 115–126, doi:10.1016/j.ecolmodel.2006.04.023, 2006.

310 Grimm, V., Berger, U., DeAngelis, D. L., Polhill, J. G., Giske, J. and Railsback, S. F.: The ODD protocol: A review  
311 and first update, *Ecol. Modell.*, 221(23), 2760–2768, doi:10.1016/j.ecolmodel.2010.08.019, 2010.

312 Haaland, C. and Bersier, L.-F.: What can sown wildflower strips contribute to butterfly conservation?: an example  
313 from a Swiss lowland agricultural landscape, *J. Insect Conserv.*, 1–9, doi:10.1007/s10841-010-9353-8, 2010.

314 Haddad: Corridor use predicted from behaviors at habitat boundaries, *Am. Nat.*, 153(2), 215–227,  
315 doi:10.2307/2463582, 1999.

316 Hamilton, N.: ggtern: An Extension to “ggplot2”, for the Creation of Ternary Diagrams, 2017.

317 Al Hassan, D., Georgelin, E., Delattre, T., Burel, F., Plantegenest, M., Kindlmann, P. and Butet, A.: Does the  
318 presence of grassy strips and landscape grain affect the spatial distribution of aphids and their carabid  
319 predators?, *Agric. For. Entomol.*, 15(1), 24–33, 2013.

320 Human Rights Council: Report of the Special Rapporteur on the right to food., 2017.

321 Kindlmann, P., Aviron, S., Burel, F. and Ouin, A.: Can the assumption of a non-random search improve our  
322 prediction of butterfly fluxes between resource patches?, *Ecol. Entomol.*, 29(4), 447–456, doi:10.1111/j.0307-  
323 6946.2004.00614.x, 2004.

324 Kindlmann, P., Aviron, S. and Burel, F.: When is landscape matrix important for determining animal fluxes  
325 between resource patches?, *Ecol. Complex.*, 2(2), 150–158, doi:10.1016/j.ecocom.2004.11.007, 2005.

326 Kleijn, D., Baquero, R. A., Clough, Y., Díaz, M., De Esteban, J., Fernández, F., Gabriel, D., Herzog, F.,  
327 Holzschuh, A., Jöhl, R., Knop, E., Kruess, A., Marshall, E. J. P., Steffan-Dewenter, I., Tschardtke, T., Verhulst, J.,  
328 West, T. M. and Yela, J. L.: Mixed biodiversity benefits of agri-environment schemes in five European countries,  
329 *Ecol. Lett.*, 9(3), 243–254, doi:10.1111/j.1461-0248.2005.00869.x, 2006.

330 Kremen, C., Williams, N. M., Aizen, M. A., Gemmill-Herren, B., LeBuhn, G., Minckley, R., Packer, L., Potts, S. G.,  
331 Roulston, T., Steffan-Dewenter, I., Vasquez, D. P., Winfree, R., Adams, L., Crone, E. E., Greenleaf, S. S., Keitt, T.  
332 H., Klein, A. M., Regetez, J. and Ricketts, T. H.: Pollination and other ecosystem services produced by mobile  
333 organisms: a conceptual framework for the effects of land-use change, *Ecol. Lett.*, 10, 299–314, 2007.

334 Long, S. J.: *Regression models for categorical and limited dependent variables*, Sage., 1997.

335 Lys, J.-A., Zimmermann, M. and Nentwig, W.: Increase in activity density and species number of carabid beetles  
336 in cereals as a result of strip-management, *Entomol. Exp. Appl.*, 73(1), 1–9, doi:10.1111/j.1570-  
337 7458.1994.tb01833.x, 1994.

338 Mailloux, J., Le Bellec, F., Kreiter, S., Tixier, M.-S. and Dubois, P.: Influence of ground cover management on  
339 diversity and density of phytoseiid mites (Acari: Phytoseiidae) in Guadeloupean citrus orchards, *Exp. Appl.*  
340 *Acarol.*, 52(3), 275–290, doi:10.1007/s10493-010-9367-7, 2010.

341 Malézieux, E., Crozat, Y., Dupraz, C., Laurans, M., Makowski, D., Ozier-Lafontaine, H., Rapidel, B., De  
342 Tourdonnet, S. and Valantin-Morison, M.: Mixing plant species in cropping systems: Concepts, tools and models:  
343 A review, in *Sustainable Agriculture*, pp. 329–353, Springer Netherlands, Dordrecht., 2009.

344 Mitchell, M. S. and Powell, R. A.: A mechanistic home range model for optimal use of spatially distributed  
345 resources, *Ecol. Modell.*, 177(1–2), 209–232, doi:10.1016/j.ecolmodel.2004.01.015, 2004.

346 Olson, D. M. and Wäckers, F. L.: Management of field margins to maximize multiple ecological services, *J. Appl.*  
347 *Ecol.*, 44(1), 13–21, 2007.

348 Palmer, S. C. F., Coulon, A. and Travis, J. M. J.: Introducing a “stochastic movement simulator” for estimating  
349 habitat connectivity, *Methods Ecol. Evol.*, 2(3), 258–268, doi:10.1111/j.2041-210X.2010.00073.x, 2011.

350 Papaïx, J., Touzeau, S., Monod, H. and Lannou, C.: Can epidemic control be achieved by altering landscape  
351 connectivity in agricultural systems?, *Ecol. Modell.*, 284, 35–47, doi:10.1016/j.ecolmodel.2014.04.014, 2014.

352 Pulido, F. and Berthold, P.: Current selection for lower migratory activity will drive the evolution of residency in a  
353 migratory bird population., *Proc. Natl. Acad. Sci. U. S. A.*, 107(16), 7341–7346, doi:10.1073/pnas.0910361107,  
354 2010.

355 R Core Team: R: a Language and Environment for Statistical computing, , doi:10.1007/978-3-540-74686-7, 2011.

356 Ratnadass, A., Fernandes, P., Avelino, J. and Habib, R.: Plant species diversity for sustainable management of  
357 crop pests and diseases in agroecosystems: a review, *Agron. Sustain. Dev.*, 32(1), 273–303,  
358 doi:10.1007/s13593-011-0022-4, 2012.

359 Root-Bernstein, M. and Jaksic, F. M.: Making research relevant? Ecological methods and the ecosystem services  
360 framework, *Earth's Futur.*, 5(7), 664–678, doi:10.1002/2016EF000501, 2017.

361 Schellhorn, N. A. and Sork, V. L.: The impact of weed diversity on insect population dynamics and crop yield in  
362 collards, *Brassica oleracea* (Brassicaceae), *Oecologia*, 111(2), 233–240, doi:10.1007/s004420050230, 1997.

363 Shelton, A. M. and Badenes-Pérez, F. R.: Concepts and applications of trap cropping in pest management, *Annu.*  
364 *Rev. Entomol.*, 51(1), 285–308, doi:10.1146/annurev.ento.51.110104.150959, 2006.

365 Simberloff, D. and Stiling, P.: Risks of species introduced for biological control, *Biol. Conserv.*, 78(1–2), 185–192,  
366 doi:10.1016/0006-3207(96)00027-4, 1996.

367 Stevens, V. M., Wesselingh, R. A. and Baguette, M.: Demographic processes in a small, isolated population of  
368 natterjack toads (*Bufo calamita*) in southern Belgium, *Herpetol. J.*, 13(2), 59–67, 2003.

369 Thenail, C. and Baudry, J.: Variation of farm spatial land use pattern according to the structure of the hedgerow  
370 network (bocage) landscape: a case study in northeast Brittany, *Agric. Ecosyst. Environ.*, 101(1), 53–72,  
371 doi:10.1016/s0167-8809(03)00199-3, 2004.

372 Theunissen, J. and Schelling, G.: Pest and disease management by intercropping: Suppression of thrips and rust  
373 in leek, *Int. J. Pest Manag.*, 42(4), 227–234, doi:10.1080/09670879609372000, 1996.

374 Tisue, S. and Wilensky, U.: *Netlogo: A simple environment for modeling complexity*, vol. 21, pp. 16–21, Boston,  
375 MA., 2004.

376 Tylianakis, J. M., Didham, R. K. and Wratten, S. D.: Improved fitness of aphid parasitoids receiving resource  
377 subsidies, *Ecology*, 85(3), 658–666, doi:10.1890/03-0222, 2004.

378 Vasseur, C., Joannon, A., Aviron, S., Burel, F., Meynard, J.-M. and Baudry, J.: The cropping systems mosaic:  
379 How does the hidden heterogeneity of agricultural landscapes drive arthropod populations?, *Agric. Ecosyst.*  
380 *Environ.*, 166, 3–14, 2013.

381 Veres, A., Petit, S., Conord, C. and Lavigne, C.: Does landscape composition affect pest abundance and their  
382 control by natural enemies? A review, *Agric. Ecosyst. Environ.*, 166, 110–117, doi:10.1016/J.AGEE.2011.05.027,  
383 2013.

384 Wäckers, F. L., van Rijn, P. C. J. and Bruin, J.: *Plant-Provided Food for Carnivorous Insects*, edited by Felix L.  
385 Wäckers, Paul C. J. van Rijn, and Jan Bruin, Cambridge University Press., 2005.

386
